# Supplementary material for: Patient-derived pancreatic cancer-on-a-chip recapitulates the tumor microenvironment
Source: PubMed Central journal article supplement (PMC8971446; doi:10.1038/s41378-022-00370-6), 2022-03-31

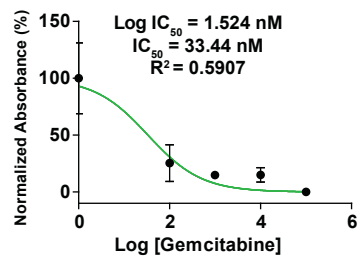

Supplement: 41378_2022_370_MOESM1_ESM.pdf [file 41378_2022_370_MOESM1_ESM.pdf]
